# Supplementary material for: APOE ε2 is associated with increased tau pathology in primary tauopathy
Source: PubMed Central journal article supplement (PMC6197187; doi:10.1038/s41467-018-06783-0), 2018-10-22
Supplement: 41467_2018_6783_MOESM1_ESM.pdf [file 41467_2018_6783_MOESM1_ESM.pdf]

## Supplementary information

### ***APOE* $\epsilon$ 2 is associated with increased tau pathology in primary tauopathy**

*Zhao et al.*

#### **Inventory**

##### **Supplementary Figures 1-11**

Supplementary Figure 1: The gene copy numbers and expression levels of human tau in the brain of Tau<sup>P301L</sup>-apoE mice.

Supplementary Figure 2: Widespread expression of human tau protein in the brain of Tau<sup>P301L</sup>-apoE mice.

Supplementary Figure 3: Hyperphosphorylated tau species, Thioflavin S-positive tau aggregates, and astrogliosis in the brain of Tau<sup>P301L</sup>-apoE mice.

Supplementary Figure 4: Accumulation of hyperphosphorylated tau species in the brain of Tau<sup>P301L</sup>-apoE mice.

Supplementary Figure 5: The examination of neuronal loss in Tau<sup>P301L</sup>-apoE mice at 6 months of age by Nissl staining.

Supplementary Figure 6: The examination of neuronal loss in Tau<sup>P301L</sup>-apoE mice at 6 months of age by NeuN staining.

Supplementary Figure 7: No prominent microgliosis and microglial activation in Tau<sup>P301L</sup>-apoE mice.

Supplementary Figure 8: Behavioral abnormalities in Tau<sup>P301L</sup>-apoE mice.

Supplementary Figure 9: ApoE mRNA expression in Tau<sup>P301L</sup>-apoE mice.

Supplementary Figure 10: Disulfide bond-mediated complex formation between tau and apoE lipoprotein particles *in vitro*.

Supplementary Figure 11: Uncropped scans of blots shown in Fig. 2e, Fig. 3a and e, Fig. 4a, and Supplementary Fig. 10.

##### **Supplementary Tables 1-5**

Supplementary Table 1: Characteristics of the PSP patients.

Supplementary Tables 2a-c: Summary of semi-quantitative tau pathology measures CB, NFT, TA, NT in 20 brain regions.

Supplementary Table 3: Association between *APOE*  $\epsilon$ 2 and semi-quantitative tau pathology severity scores.

Supplementary Table 4: Association of *APOE* genotype with Thal amyloid phase and TDP-43 pathology.

Supplemental Table 5: Subject characteristics for human genetic study.

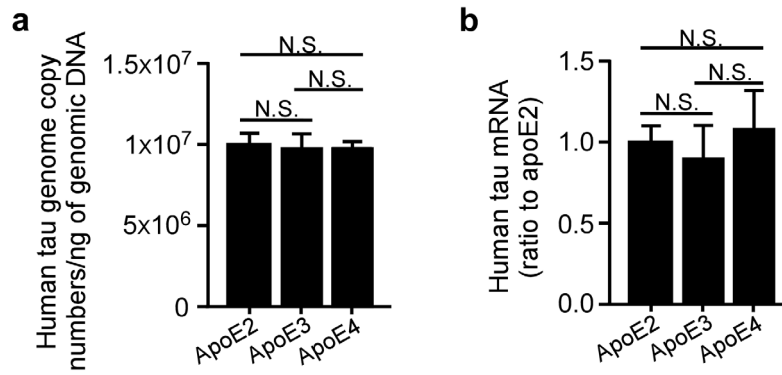

**Supplementary Figure 1: The gene copy numbers and expression levels of human tau in the brain of Tau<sup>P301L</sup>-apoE mice.** AAV-Tau<sup>P301L</sup> genome copy numbers and tau mRNA levels were determined in the cortex of Tau<sup>P301L</sup>-apoE2, -apoE3, and -apoE4 mice at 6 months of age (n=8 mice/group, mixed gender). (a) Genomic DNA was isolated from cortex and the vector genome copy numbers/ng of genomic DNA was determined using qPCR. (b) RNA was isolated from cortex and human tau mRNA expression was detected by qPCR. Data are expressed as mean ± SEM. Mann-Whitney tests followed by Bonferroni correction for multiple comparisons were used. P-values < 0.0167 were considered to be statistically significant. N.S., not significant.

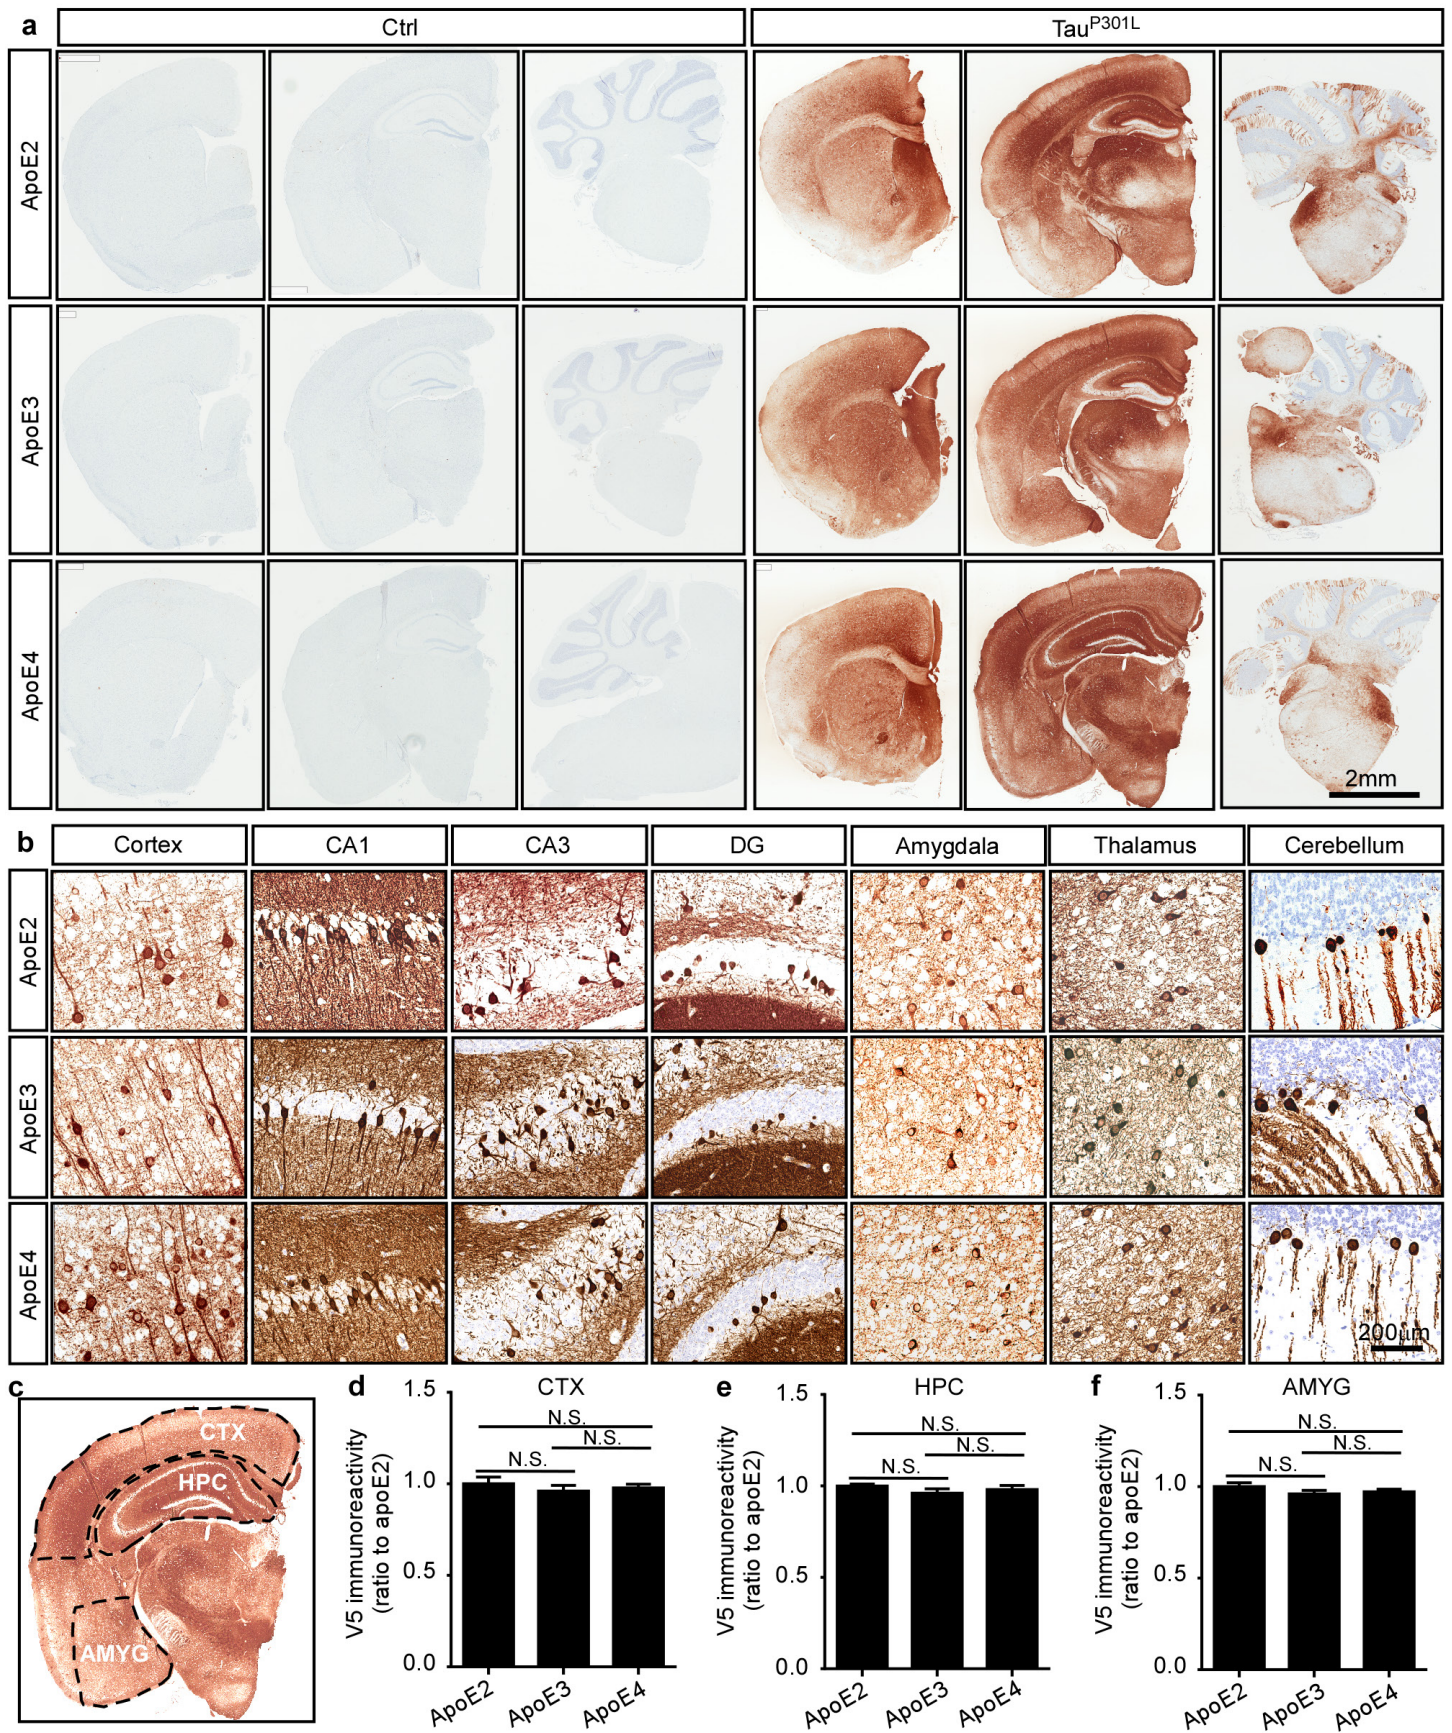

Brain slices from control (Ctrl) and V5-tagged Tau<sup>P301L</sup>-apoE2, -apoE3, and -apoE4 mice at 6 months of age were stained with V5 antibody whose immunoreactivity represents the expression of human tau. (a) The V5 expression in three different brain planes of the coronal sections from apoE-TR mice expressing GFP or human Tau<sup>P301L</sup> was shown. Scale bar, 2mm. (b) The V5 expression pattern in the region of cortex, CA1, CA3, DG, amygdala, thalamus and cerebellum from Tau<sup>P301L</sup>-apoE mice was shown. Scale bar, 200  $\mu$ m. (c-f) The immunoreactivity of V5 staining in the cortex (CTX, d), hippocampus (HPC, e), and amygdala (AMYG, f) from Tau<sup>P301L</sup>-apoE mice was quantified using Aperio ImageScope (n=12 mice/group in Ctrl groups, n=13 mice for Tau<sup>P301L</sup>-apoE2 group, n=20 mice for Tau<sup>P301L</sup>-apoE3 group, n=22 mice for Tau<sup>P301L</sup>-apoE4 group, mixed gender). The boundaries of the relevant regions were shown (c). Data are expressed as mean  $\pm$  SEM. Mann-Whitney tests followed by Bonferroni correction for multiple comparisons were used. P-values < 0.0167 were considered to be statistically significant. N.S., not significant.

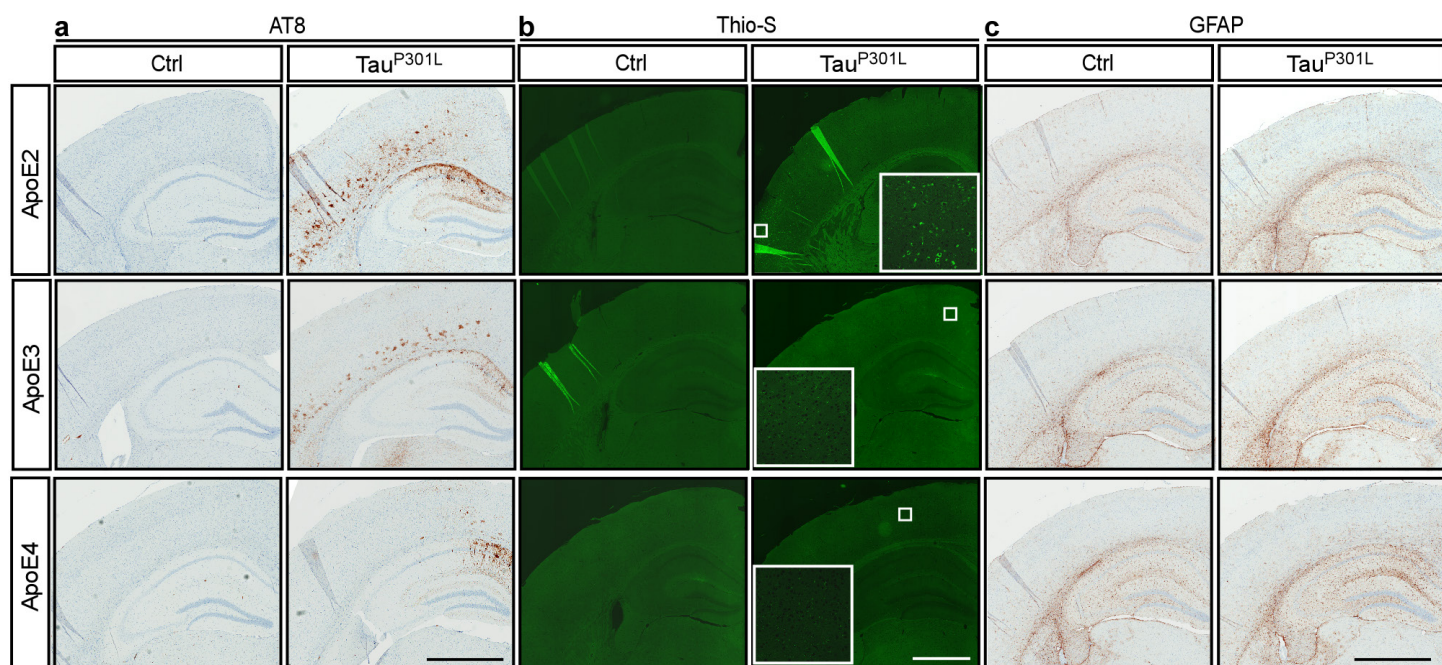

**Supplementary Figure 3: Hyperphosphorylated tau species, Thioflavin S-positive tau aggregates, and astroglial cells in the brain of Tau<sup>P301L</sup>-apoE mice.**

The hyperphosphorylated tau, aggregated tau, and astroglial cells were determined by AT8, Thioflavin S, and GFAP staining in the brain slices from AAV-GFP control mice (Ctrl) and AAV-Tau<sup>P301L</sup>-apoE2, -apoE3, and -apoE4 mice at 6 months of age. Representative images are shown for the deposition of AT8-positive tau species (a, scale bar 1mm), Thioflavin S-positive tau aggregates (b, scale bar 800  $\mu$ m), and GFAP-positive astroglial cells (c, scale bar 1mm).

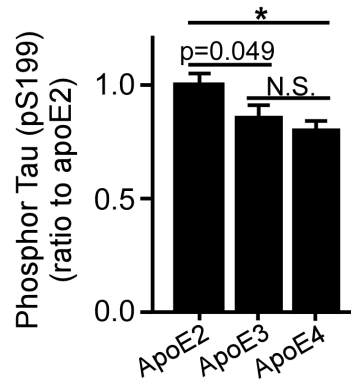

**Supplementary Figure 4: Accumulation of hyperphosphorylated tau species in the brain of Tau<sup>P301L</sup>-apoE mice.**

The amount of hyperphosphorylated tau (pS199) in the cortex (RIPA-soluble fraction) of control and Tau<sup>P301L</sup>-apoE mice (n=8 mice/group, mixed gender) at 6 months of age was examined by ELISA. Data are expressed as mean ± SEM. Mann-Whitney tests followed by Bonferroni correction for multiple comparisons were used. \*p < 0.0167; N.S., not significant.

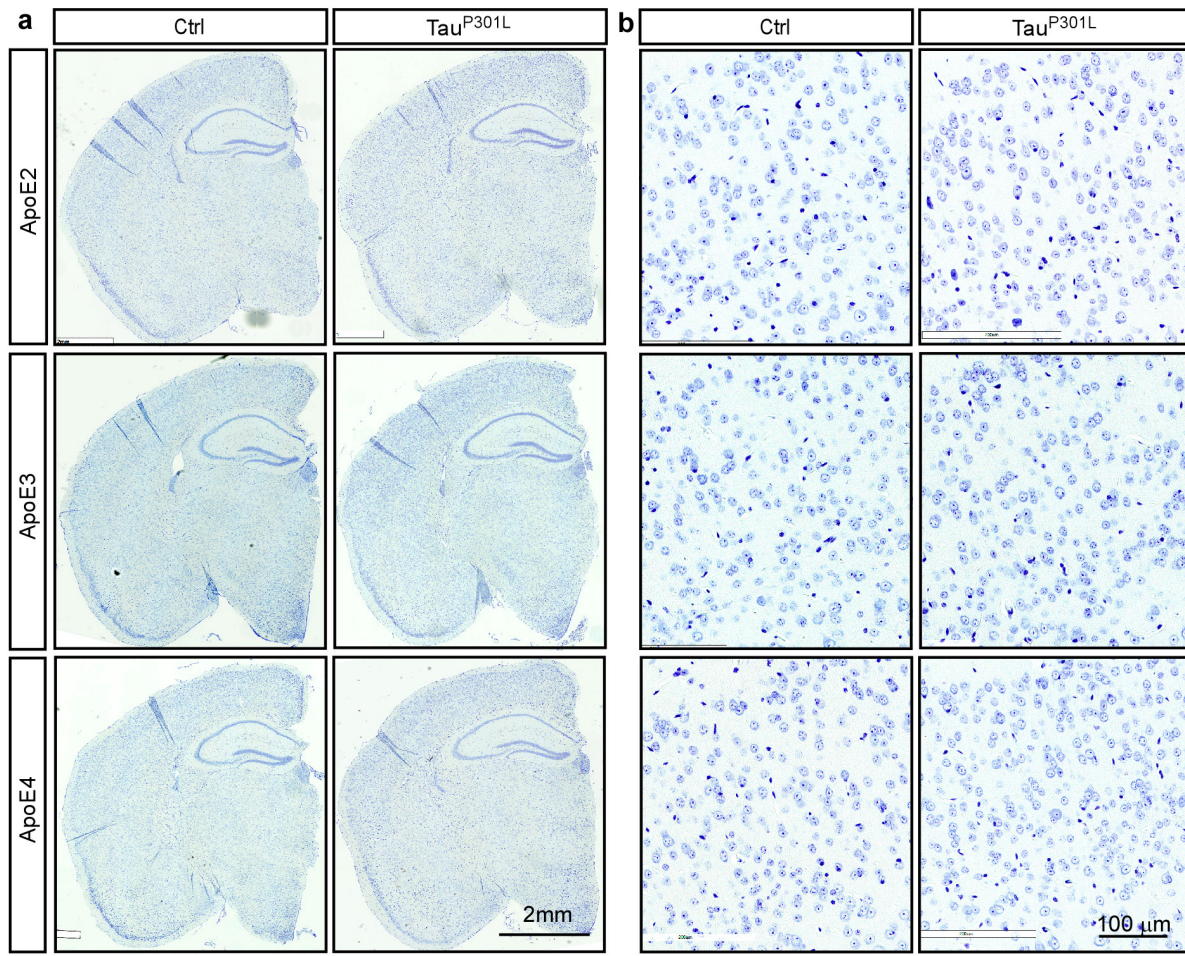

**Supplementary Figure 5: The examination of neuronal loss in Tau<sup>P301L</sup>-apoE mice at 6 months of age by Nissl staining.**

Brain slices from control (Ctrl) and Tau<sup>P301L</sup>-apoE2, -apoE3, and -apoE4 mice at 6 months of age were performed by Nissl staining (a, scale bar is 2 mm). Representative images were shown for the Nissl staining-positive cells in the cortex of control or Tau<sup>P301L</sup>-apoE2, -apoE3, and -apoE4 mice at 6 months of age (b, scale bar is 100 μm). The numbers of Nissl staining-positive cells in the cortical region were quantified by Aperio ImageScope (n=6 mice/group, mixed gender) (c). Data represent mean ± SEM. Mann-Whitney tests followed by Bonferroni correction for multiple comparisons were used. P-values < 0.0167 were considered to be statistically significant. N.S., not significant.

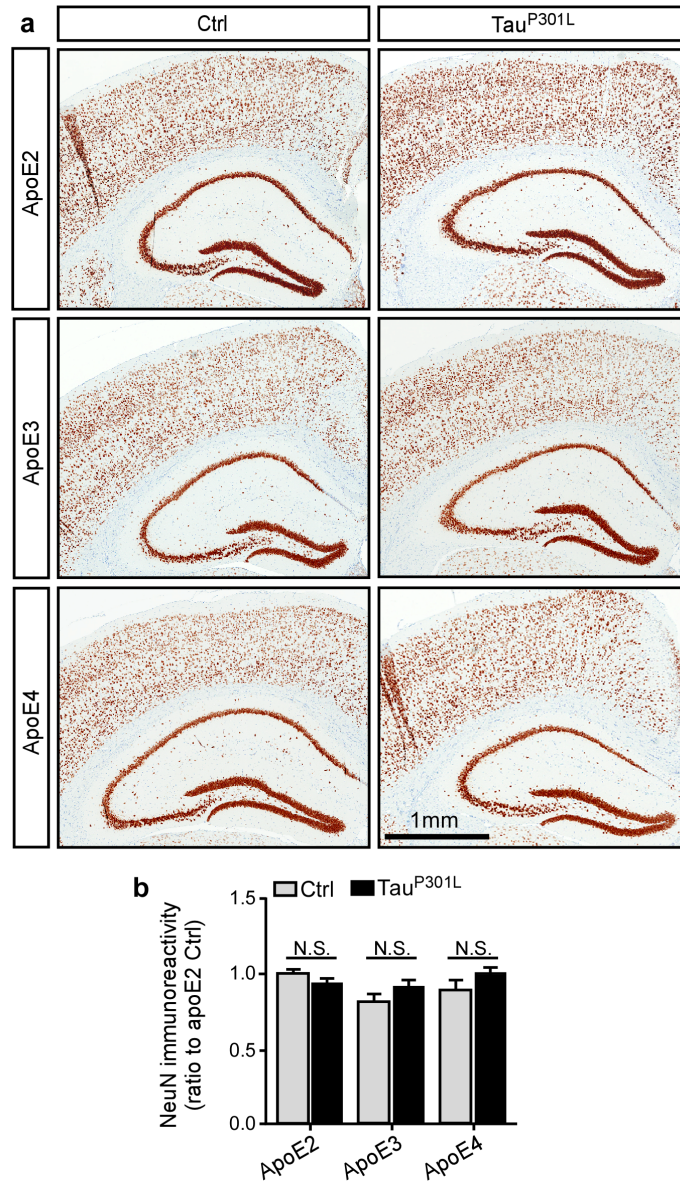

**Supplementary Figure 6: The examination of neuronal loss in Tau<sup>P301L</sup>-apoE mice at 6 months of age by NeuN staining.**

Brain slices from control (Ctrl) and Tau<sup>P301L</sup>-apoE2, -apoE3, and -apoE4 mice at 6 months of age were immunostained by anti-NeuN antibody. Representative images were shown for the NeuN-positive cells in the cortex of control or Tau<sup>P301L</sup>-apoE2, -apoE3, and -apoE4 mice at 6 months of age (a). The immunoreactivity of NeuN staining was evaluated by Aperio ImageScope (n=6 mice/group, mixed gender) (b). Data represent mean ± SEM. Mann-Whitney tests followed by Bonferroni correction for multiple comparisons were used. P-values < 0.0167 were considered to be statistically significant. N.S., not significant. Scale bar, 1 mm.

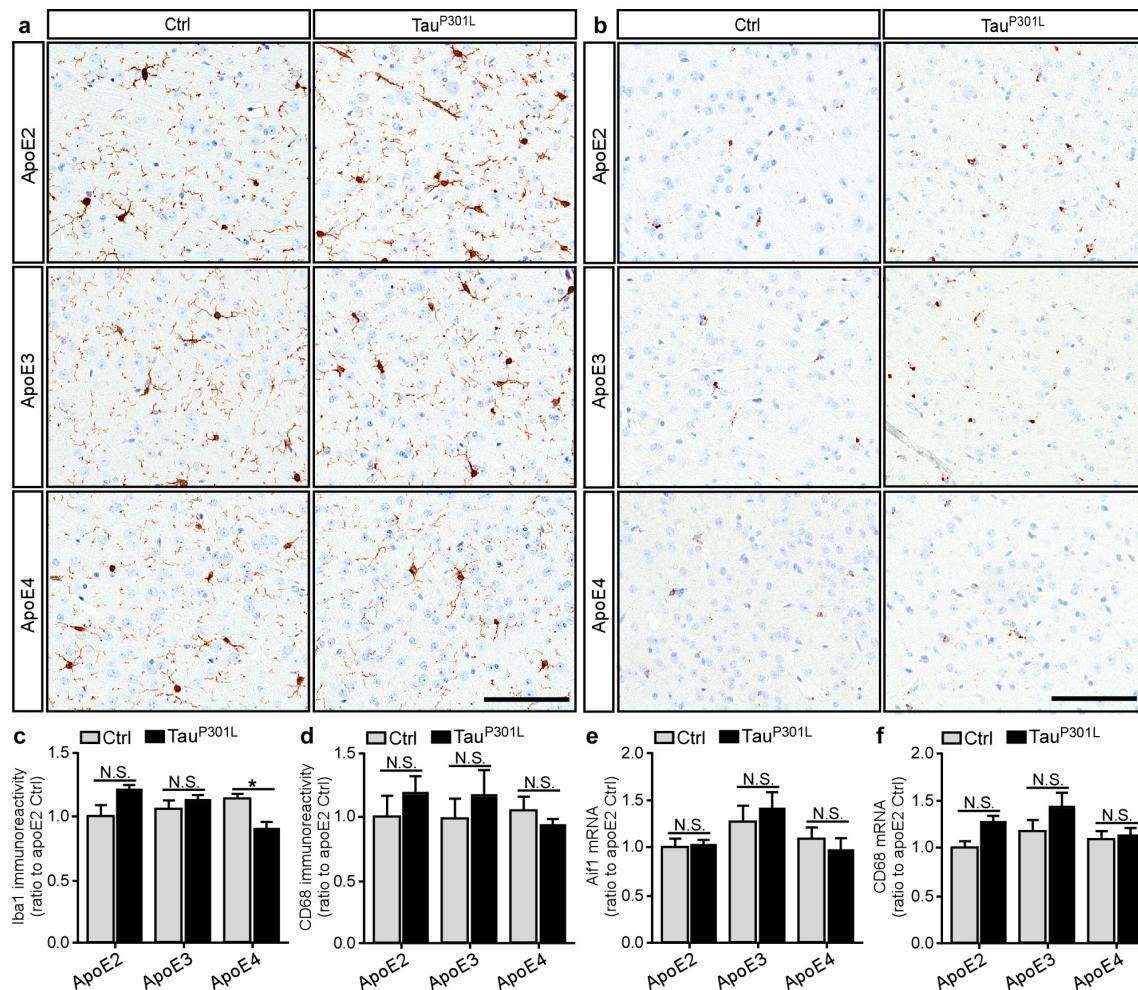

**Supplementary Figure 7: No prominent microgliosis and microglial activation in Tau<sup>P301L</sup>-apoE mice.**

Brain slices from control (Ctrl) and Tau<sup>P301L</sup>-apoE2, -apoE3, and -apoE4 mice at 6 months of age were immunostained by anti-Iba1 or anti-CD68 antibody. Representative images were shown for the Iba1-positive (a) or CD68-positive (b) microglia in the cortex of control or Tau<sup>P301L</sup>-apoE2, -apoE3, and -apoE4 mice at 6 months of age (a). The immunoreactivity of Iba1 (c) and CD68 (d) staining was evaluated by Aperio ImageScope (n=6 mice/group, mixed gender). RNA was isolated from brain cortex of Ctrl and Tau<sup>P301L</sup>-apoE2, -apoE3, and -apoE4 mice at 6 months of age (n=8 mice/group, mixed gender), and the *Aif1* (e) and *CD68* (f) mRNA levels were detected with qPCR. Data represent mean ± SEM. Mann-Whitney tests followed by Bonferroni correction for multiple comparisons were used. \*p < 0.0167; N.S., not significant. Scale bar, 100 μm.



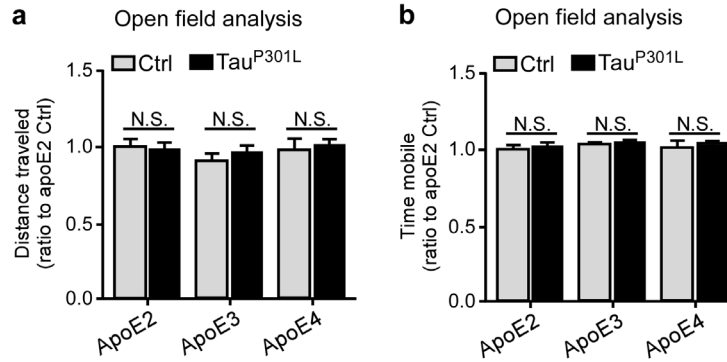

**Supplementary Figure 8: Behavioral abnormalities in Tau<sup>P301L</sup>-apoE mice.**

Anxiety-related behaviors were analyzed in control (Ctrl, n=12 mice/group, mixed gender) and Tau<sup>P301L</sup>-apoE2, -apoE3, and -apoE4 mice (n=13 mice for Tau<sup>P301L</sup>-apoE2 group, n=20 mice for Tau<sup>P301L</sup>-apoE3 group, n=22 mice for Tau<sup>P301L</sup>-apoE4 group, mixed gender) assessed by open field analysis at 6 months of age. The total distance traveled (a), and time spent mobile (b) were shown. Data represent mean ± SEM. Mann-Whitney tests followed by Bonferroni correction for multiple comparisons were used. P-values < 0.0167 were considered to be statistically significant. N.S., not significant.

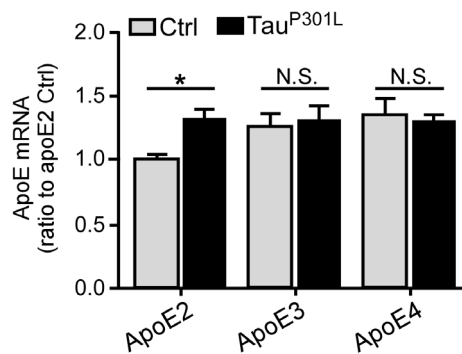

**Supplementary Figure 9: ApoE mRNA expression in Tau<sup>P301L</sup>-apoE mice.**

RNA was isolated from brain cortex of the control (Ctrl) and Tau<sup>P301L</sup>-apoE2, -apoE3, and -apoE4 mice at 6 months of age (n=8 mice/group, mixed gender). ApoE mRNA expression was detected with qPCR. Data are expressed as mean ± SEM. Mann-Whitney tests followed by Bonferroni correction for multiple comparisons were used. \*p < 0.0167; N.S., not significant.

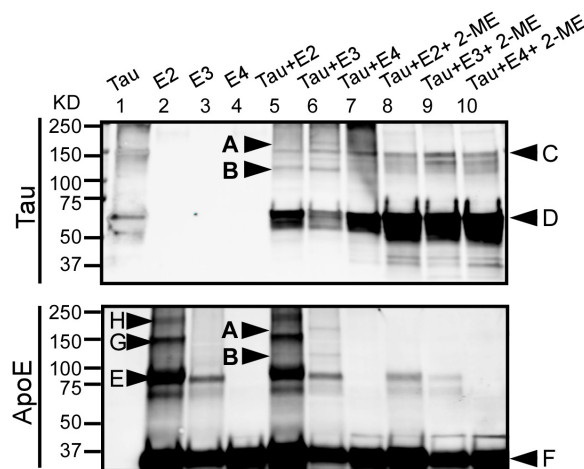

**Supplementary Figure 10: Disulfide bond-mediated complex formation between tau and apoE lipoprotein particles *in vitro*.**

The interaction between tau and lipidated-apoE particle was evaluated by solution binding assay, followed by Western blotting (three independent experiments). Recombinant human tau protein and immortalized astrocyte secreted apoE particles were incubated for 1 hr at 37°C in 20 µl of phosphate-buffered saline. The reaction was quenched by addition of 20 µl of sample buffer without (Lane 1-7) or with (Lane 8-10) 2-mercaptoethanol (2-ME). The tau/apoE complexes (bands A and B) were determined by both tau and apoE immunoblotting. Band C was a nonspecific band from tau immunoblot. Bands D and F were monomeric tau and apoE, respectively. Bands E, G, and H were estimated to be apoE dimer, tetramer, and hexamer, respectively.

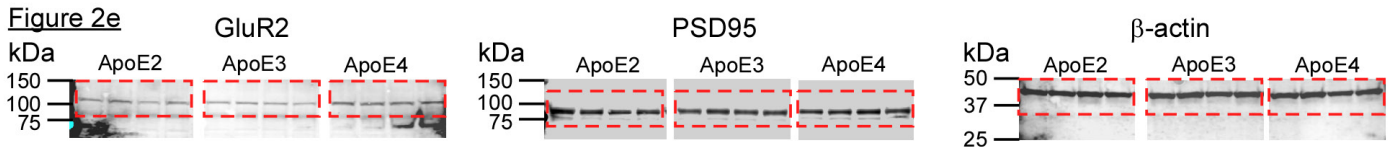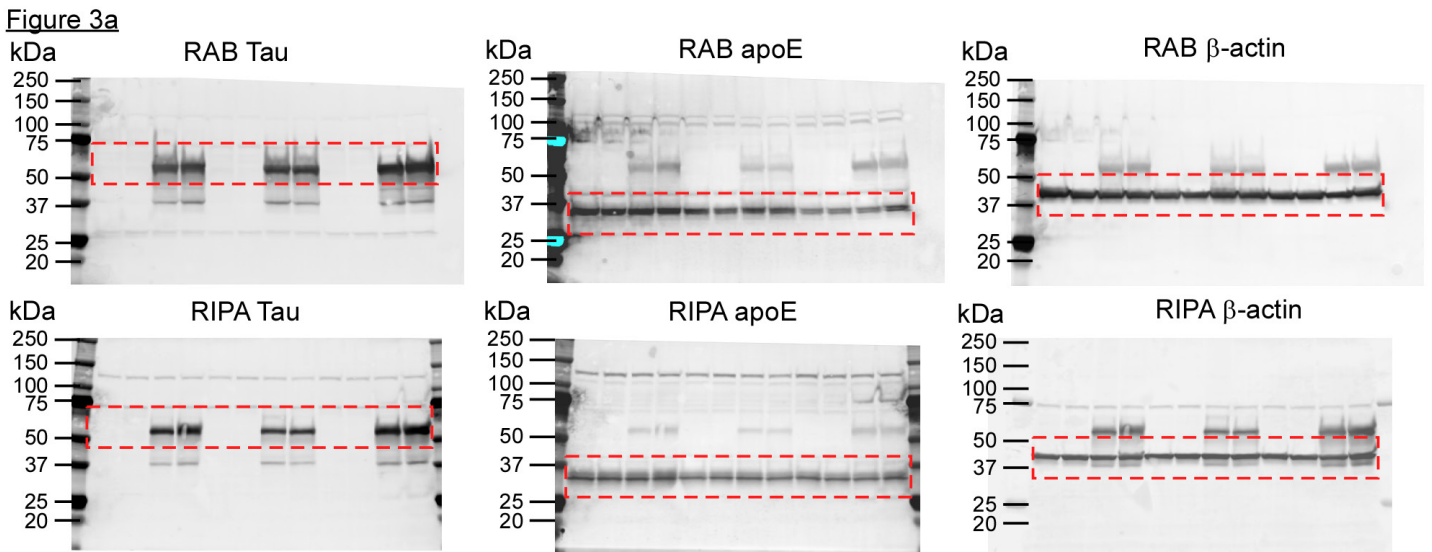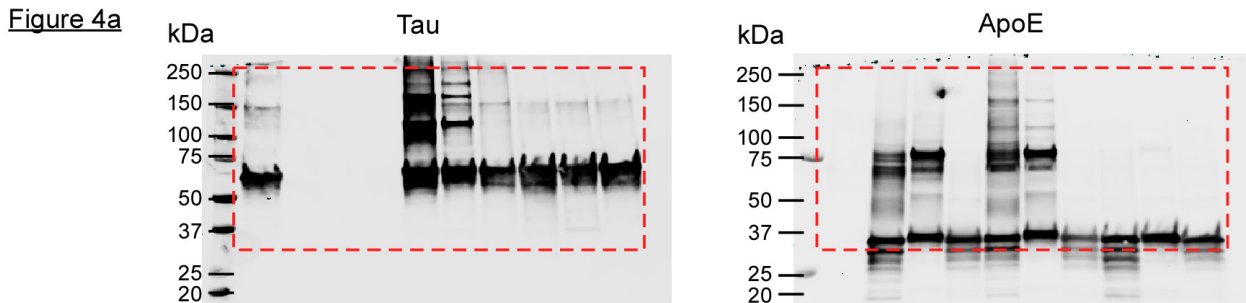

**Supplementary Figure 10**

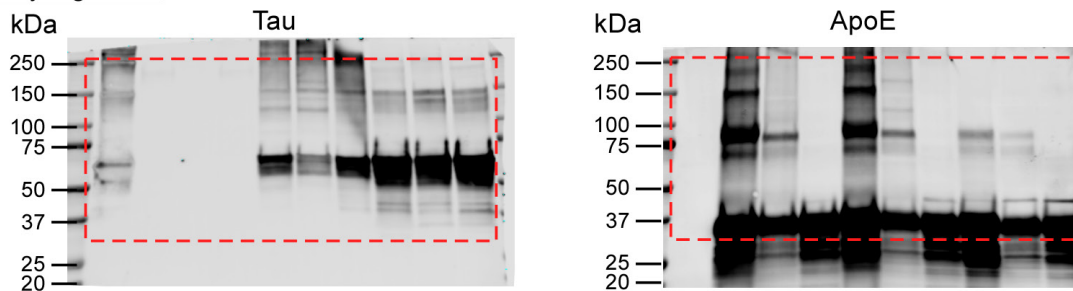

**Supplementary Figure 11: Uncropped scans of blots shown in Fig. 2e, Fig. 3a and e, Fig. 4a, and Supplementary Fig. 10.**

**Supplemental Table 1: Characteristics of PSP patients for human pathological study.**

| <b>Variable</b>                 | <b>Summary (N=858)</b> |
|---------------------------------|------------------------|
| Age at death (years)            | 75 (52, 98)            |
| Sex                             |                        |
| Female                          | 399 (46%)              |
| Male                            | 459 (54%)              |
| Braak NFT stage                 |                        |
| 0                               | 120 (14%)              |
| I                               | 142 (17%)              |
| II                              | 253 (30%)              |
| III                             | 270 (32%)              |
| IV                              | 54 (6%)                |
| V                               | 12 (1%)                |
| VI                              | 7 (0.8%)               |
| Thal amyloid phase              |                        |
| 0                               | 377 (44%)              |
| 1                               | 147 (17%)              |
| 2                               | 61 (7%)                |
| 3                               | 202 (24%)              |
| 4                               | 47 (6%)                |
| 5                               | 24 (3%)                |
| TDP-43 pathology (presence)     | 36 (5%)                |
| <i>APOE</i> genotype            |                        |
| $\epsilon 2/\epsilon 2$         | 12 (1.4%)              |
| $\epsilon 2/\epsilon 3$         | 98 (11%)               |
| $\epsilon 2/\epsilon 4$         | 19 (2%)                |
| $\epsilon 3/\epsilon 3$         | 549 (64%)              |
| $\epsilon 3/\epsilon 4$         | 168 (20%)              |
| $\epsilon 4/\epsilon 4$         | 12 (1.4%)              |
| CB overall tau pathology score  | 1.6 (0.2, 2.5)         |
| NFT overall tau pathology score | 2.2 (0.8, 2.9)         |
| TA overall tau pathology score  | 1.0 (0.1, 2.4)         |
| NT overall tau pathology score  | 2.2 (0.3, 2.9)         |

The sample median (minimum, maximum) is given for continuous variables. Information was unavailable regarding TDP-43 pathology for 94 patients.

**Supplemental Table 2a: Summary of semi-quantitative tau pathology measures CB, NFT, TA, NT in 20 brain regions.**

| <b>Anatomical region</b>        | <b>CB</b>  | <b>NFT</b> | <b>TA</b> | <b>NT</b> |
|---------------------------------|------------|------------|-----------|-----------|
| <b>Basal nucleus of Meynert</b> |            |            |           |           |
| Missing                         | 21         | 1          | 43        | 4         |
| 0=None                          | 214 (26%)  | 2 (0.2%)   | 434 (53%) | 44 (5%)   |
| 1=Mild                          | 552 (66%)  | 27 (3%)    | 333 (41%) | 183 (21%) |
| 2=Moderate                      | 67 (8%)    | 277 (32%)  | 47 (6%)   | 333 (39%) |
| 3=Severe                        | 4 (0.5%)   | 551 (64%)  | 1 (0.1%)  | 294 (34%) |
| <b>Caudate nucleus</b>          |            |            |           |           |
| Missing                         | 1          | 1          | 1         | 13        |
| 0=None                          | 28 (3%)    | 1 (0.1%)   | 5 (0.6%)  | 52 (6%)   |
| 1=Mild                          | 444 (528%) | 295 (34%)  | 65 (8%)   | 506 (60%) |
| 2=Moderate                      | 271 (32%)  | 491 (57%)  | 201 (24%) | 253 (30%) |
| 3=Severe                        | 114 (13%)  | 70 (8%)    | 586 (68%) | 34 (4%)   |
| <b>Globus pallidus</b>          |            |            |           |           |
| Missing                         | 2          | 1          | 39        | 8         |
| 0=None                          | 17 (2%)    | 3 (0.4%)   | 307 (38%) | 43 (5%)   |
| 1=Mild                          | 169 (20%)  | 155 (18%)  | 327 (40%) | 191 (22%) |
| 2=Moderate                      | 307 (36%)  | 485 (57%)  | 165 (20%) | 378 (44%) |
| 3=Severe                        | 363 (42%)  | 214 (25%)  | 20 (2%)   | 238 (28%) |
| <b>Hypothalamus</b>             |            |            |           |           |
| Missing                         | 81         | 20         | 88        | 27        |
| 0=None                          | 454 (58%)  | 0 (0%)     | 616 (80%) | 89 (11%)  |
| 1=Mild                          | 309 (40%)  | 48 (6%)    | 142 (18%) | 382 (46%) |
| 2=Moderate                      | 13 (2%)    | 270 (32%)  | 7 (1%)    | 252 (30%) |
| 3=Severe                        | 1 (0.1%)   | 520 (62%)  | 5 (1%)    | 108 (13%) |
| <b>Motor cortex</b>             |            |            |           |           |
| Missing                         | 9          | 5          | 7         | 16        |
| 0=None                          | 25 (3%)    | 10 (1%)    | 17 (2%)   | 59 (7%)   |
| 1=Mild                          | 170 (20%)  | 206 (24%)  | 134 (16%) | 196 (23%) |
| 2=Moderate                      | 396 (47%)  | 446 (52%)  | 207 (24%) | 319 (38%) |
| 3=Severe                        | 258 (30%)  | 191 (22%)  | 493 (58%) | 268 (32%) |
| <b>Subthalamic nucleus</b>      |            |            |           |           |
| Missing                         | 2          | 2          | 18        | 4         |
| 0=None                          | 4 (0.5%)   | 1 (0.1%)   | 182 (22%) | 4 (0.5%)  |
| 1=Mild                          | 169 (20%)  | 68 (8%)    | 225 (27%) | 44 (5%)   |
| 2=Moderate                      | 358 (42%)  | 270 (32%)  | 220 (26%) | 109 (13%) |
| 3=Severe                        | 325 (38%)  | 517 (60%)  | 213 (25%) | 697 (82%) |
| <b>Inferior temporal gyrus</b>  |            |            |           |           |
| Missing                         | 62         | 21         | 41        | 85        |
| 0=None                          | 493 (62%)  | 168 (20%)  | 204 (25%) | 573 (74%) |
| 1=Mild                          | 270 (34%)  | 517 (62%)  | 487 (60%) | 107 (14%) |
| 2=Moderate                      | 30 (4%)    | 102 (12%)  | 108 (13%) | 34 (4%)   |
| 3=Severe                        | 3 (0.4%)   | 50 (6%)    | 18 (2%)   | 59 (8%)   |

**Supplemental Table 2b: Summary of semi-quantitative tau pathology measures CB, NFT, TA, NT in 20 brain regions.**

| <b>Anatomical region</b>        | <b>CB</b> | <b>NFT</b> | <b>TA</b> | <b>NT</b> |
|---------------------------------|-----------|------------|-----------|-----------|
| <b>Thalamic fasciculus</b>      |           |            |           |           |
| Missing                         | 2         | N/A        | N/A       | 3         |
| 0=None                          | 2 (0.2%)  | N/A        | N/A       | 6 (0.7%)  |
| 1=Mild                          | 85 (10%)  | N/A        | N/A       | 90 (10%)  |
| 2=Moderate                      | 293 (34%) | N/A        | N/A       | 319 (37%) |
| 3=Severe                        | 476 (56%) | N/A        | N/A       | 440 (52%) |
| <b>Ventral thalamus</b>         |           |            |           |           |
| Missing                         | 1         | 1          | 15        | 2         |
| 0=None                          | 8 (1%)    | 5 (1%)     | 93 (11%)  | 11 (1%)   |
| 1=Mild                          | 137 (16%) | 169 (20%)  | 321 (38%) | 49 (6%)   |
| 2=Moderate                      | 301 (35%) | 457 (53%)  | 316 (38%) | 221 (26%) |
| 3=Severe                        | 411 (48%) | 226 (26%)  | 113 (13%) | 575 (67%) |
| <b>Cerebellar white matter</b>  |           |            |           |           |
| Missing                         | 6         | N/A        | N/A       | 12        |
| 0=None                          | 22 (3%)   | N/A        | N/A       | 69 (8%)   |
| 1=Mild                          | 178 (21%) | N/A        | N/A       | 363 (43%) |
| 2=Moderate                      | 393 (46%) | N/A        | N/A       | 263 (31%) |
| 3=Severe                        | 259 (30%) | N/A        | N/A       | 151 (18%) |
| <b>Dentate nucleus</b>          |           |            |           |           |
| Missing                         | 33        | 11         | 86        | 10        |
| 0=None                          | 216 (26%) | 6 (1%)     | 662 (86%) | 20 (2%)   |
| 1=Mild                          | 538 (65%) | 123 (14%)  | 99 (13%)  | 276 (32%) |
| 2=Moderate                      | 69 (8%)   | 339 (40%)  | 10 (1%)   | 494 (58%) |
| 3=Severe                        | 2 (0.2%)  | 379 (45%)  | 1 (0.1%)  | 58 (7%)   |
| <b>Inferior olivary nucleus</b> |           |            |           |           |
| Missing                         | 66        | 61         | 99        | 58        |
| 0=None                          | 103 (13%) | 30 (4%)    | 542 (71%) | 13 (2%)   |
| 1=Mild                          | 536 (68%) | 331 (42%)  | 192 (25%) | 64 (8%)   |
| 2=Moderate                      | 142 (18%) | 312 (39%)  | 24 (3%)   | 187 (23%) |
| 3=Severe                        | 11 (1%)   | 124 (16%)  | 1 (0.1%)  | 536 (67%) |
| <b>Locus ceruleus</b>           |           |            |           |           |
| Missing                         | 141       | 42         | N/A       | 43        |
| 0=None                          | 638 (89%) | 1 (0.1%)   | N/A       | 20 (2%)   |
| 1=Mild                          | 70 (10%)  | 32 (4%)    | N/A       | 119 (15%) |
| 2=Moderate                      | 7 (1%)    | 225 (28%)  | N/A       | 350 (43%) |
| 3=Severe                        | 2 (0.3%)  | 558 (68%)  | N/A       | 326 (40%) |
| <b>Medullary tegmentum</b>      |           |            |           |           |
| Missing                         | 50        | 44         | 134       | 47        |
| 0=None                          | 80 (10%)  | 2 (0.2%)   | 643 (89%) | 5 (1%)    |
| 1=Mild                          | 428 (53%) | 15 (2%)    | 76 (10%)  | 38 (5%)   |
| 2=Moderate                      | 259 (32%) | 188 (23%)  | 4 (1%)    | 111 (14%) |
| 3=Severe                        | 41 (5%)   | 609 (75%)  | 1 (0.1%)  | 657 (81%) |

N/A is given when the given lesion was not assessed in the given anatomical structure.

**Supplemental Table 2c: Summary of semi-quantitative tau pathology measures CB, NFT, TA, NT in 20 brain regions.**

| <b>Anatomical region</b>  | <b>CB</b> | <b>NFT</b> | <b>TA</b> | <b>NT</b> |
|---------------------------|-----------|------------|-----------|-----------|
| <b>Midbrain tectum</b>    |           |            |           |           |
| Missing                   | 6         | 20         | 23        | 7         |
| 0=None                    | 14 (2%)   | 2 (0.2%)   | 44 (5%)   | 8 (1%)    |
| 1=Mild                    | 93 (11%)  | 194 (23%)  | 150 (18%) | 45 (5%)   |
| 2=Moderate                | 279 (33%) | 424 (51%)  | 337 (40%) | 130 (15%) |
| 3=Severe                  | 466 (55%) | 218 (26%)  | 304 (36%) | 668 (78%) |
| <b>Oculomotor complex</b> |           |            |           |           |
| Missing                   | 158       | 116        | 189       | 117       |
| 0=None                    | 329 (47%) | 5 (1%)     | 546 (82%) | 36 (5%)   |
| 1=Mild                    | 308 (44%) | 146 (20%)  | 106 (16%) | 178 (24%) |
| 2=Moderate                | 54 (8%)   | 297 (40%)  | 16 (2%)   | 281 (38%) |
| 3=Severe                  | 9 (1%)    | 294 (40%)  | 1 (0.1%)  | 246 (33%) |
| <b>Pontine base</b>       |           |            |           |           |
| Missing                   | 15        | 6          | 103       | 14        |
| 0=None                    | 103 (12%) | 14 (2%)    | 682 (90%) | 59 (7%)   |
| 1=Mild                    | 524 (62%) | 98 (12%)   | 67 (9%)   | 224 (26%) |
| 2=Moderate                | 204 (24%) | 182 (21%)  | 6 (1%)    | 392 (46%) |
| 3=Severe                  | 12 (1%)   | 558 (66%)  | 0 (0%)    | 169 (20%) |
| <b>Pontine tegmentum</b>  |           |            |           |           |
| Missing                   | 28        | 10         | 94        | 24        |
| 0=None                    | 27 (3%)   | 1 (0.1%)   | 625 (82%) | 7 (1%)    |
| 1=Mild                    | 277 (33%) | 92 (11%)   | 124 (16%) | 55 (7%)   |
| 2=Moderate                | 371 (45%) | 342 (40%)  | 13 (2%)   | 182 (22%) |
| 3=Severe                  | 155 (19%) | 413 (49%)  | 2 (0.3%)  | 590 (71%) |
| <b>Red nucleus</b>        |           |            |           |           |
| Missing                   | 6         | 4          | 21        | 4         |
| 0=None                    | 23 (3%)   | 9 (1%)     | 145 (17%) | 17 (2%)   |
| 1=Mild                    | 130 (15%) | 202 (24%)  | 281 (34%) | 81 (10%)  |
| 2=Moderate                | 234 (28%) | 398 (47%)  | 276 (33%) | 198 (23%) |
| 3=Severe                  | 465 (55%) | 245 (29%)  | 135 (16%) | 558 (65%) |
| <b>Substantia nigra</b>   |           |            |           |           |
| Missing                   | 6         | 3          | 31        | 3         |
| 0=None                    | 50 (6%)   | 0 (0%)     | 354 (43%) | 3 (0.4%)  |
| 1=Mild                    | 422 (50%) | 99 (12%)   | 316 (38%) | 194 (23%) |
| 2=Moderate                | 309 (36%) | 404 (47%)  | 140 (17%) | 460 (54%) |
| 3=Severe                  | 71 (8%)   | 352 (41%)  | 17 (2%)   | 198 (23%) |

**Supplemental Table 3: Association between *APOE*  $\epsilon 2$  and semi-quantitative tau pathology severity scores.**

| Anatomical region       | Association between presence of <i>APOE</i> $\epsilon 2$ (vs. $\epsilon 3/\epsilon 3$ ) and CB |         | Association between presence of <i>APOE</i> $\epsilon 2$ (vs. $\epsilon 3/\epsilon 3$ ) and TA |         | Association between presence of <i>APOE</i> $\epsilon 2$ (vs. $\epsilon 3/\epsilon 3$ ) and NT |         |
|-------------------------|------------------------------------------------------------------------------------------------|---------|------------------------------------------------------------------------------------------------|---------|------------------------------------------------------------------------------------------------|---------|
|                         | OR (95% CI)                                                                                    | P-Value | OR (95% CI)                                                                                    | P-Value | OR (95% CI)                                                                                    | P-Value |
| Basal nucleus           | 1.48 (0.98, 2.24)                                                                              | 0.066   | 1.92 (1.31, 2.80)                                                                              | 0.001   | 1.59 (1.11, 2.28)                                                                              | 0.012   |
| Caudate putamen         | 1.18 (0.81, 1.70)                                                                              | 0.39    | 1.31 (0.86, 2.01)                                                                              | 0.21    | 1.14 (0.77, 1.67)                                                                              | 0.52    |
| Globus pallidus         | 1.29 (0.89, 1.87)                                                                              | 0.18    | 1.64 (1.14, 2.37)                                                                              | 0.008   | 1.05 (0.73, 1.51)                                                                              | 0.78    |
| Hypothalamus            | 1.02 (0.68, 1.53)                                                                              | 0.92    | 1.26 (0.78, 2.03)                                                                              | 0.36    | 1.00 (0.70, 1.44)                                                                              | 0.98    |
| Motor cortex            | 1.05 (0.73, 1.50)                                                                              | 0.81    | 1.33 (0.90, 1.97)                                                                              | 0.15    | 1.19 (0.84, 1.70)                                                                              | 0.33    |
| Subthalamic nucleus     | 1.36 (0.94, 1.95)                                                                              | 0.10    | 1.65 (1.16, 2.34)                                                                              | 0.005   | 2.05 (1.13, 3.70)                                                                              | 0.018   |
| Temporal cortex         | 1.24 (0.82, 1.87)                                                                              | 0.31    | 1.15 (0.78, 1.71)                                                                              | 0.48    | 1.12 (0.67, 1.88)                                                                              | 0.66    |
| Thalamic fasciculus     | 1.18 (0.80, 1.74)                                                                              | 0.41    | N/A                                                                                            | N/A     | 1.23 (0.84, 1.79)                                                                              | 0.29    |
| Ventral thalamus        | 1.38 (0.95, 2.02)                                                                              | 0.095   | 1.52 (1.06, 2.17)                                                                              | 0.023   | 1.54 (0.99, 2.39)                                                                              | 0.058   |
| Cerebellar white matter | 1.15 (0.80, 1.66)                                                                              | 0.44    | N/A                                                                                            | N/A     | 1.12 (0.78, 1.59)                                                                              | 0.55    |
| Dentate nucleus         | 1.16 (0.77, 1.74)                                                                              | 0.48    | 1.37 (0.79, 2.36)                                                                              | 0.26    | 1.36 (0.92, 2.01)                                                                              | 0.12    |
| Inferior olive          | 1.87 (1.24, 2.83)                                                                              | 0.003   | 1.07 (0.69, 1.67)                                                                              | 0.77    | 1.27 (0.83, 1.96)                                                                              | 0.27    |
| Locus ceruleus          | 1.05 (0.54, 2.07)                                                                              | 0.88    | N/A                                                                                            | N/A     | 1.37 (0.94, 1.98)                                                                              | 0.10    |
| Medullary tegmentum     | 1.40 (0.96, 2.05)                                                                              | 0.080   | 1.01 (0.53, 1.94)                                                                              | 0.97    | 2.02 (1.10, 3.69)                                                                              | 0.023   |
| Midbrain tectum         | 1.40 (0.95, 2.07)                                                                              | 0.087   | 1.89 (1.31, 2.73)                                                                              | 0.001   | 1.42 (0.86, 2.34)                                                                              | 0.17    |
| Oculomotor complex      | 0.75 (0.50, 1.15)                                                                              | 0.19    | 0.57 (0.30, 1.09)                                                                              | 0.090   | 1.18 (0.80, 1.73)                                                                              | 0.41    |
| Pontine base            | 1.47 (1.00, 2.16)                                                                              | 0.050   | 1.13 (0.58, 2.21)                                                                              | 0.72    | 1.06 (0.74, 1.51)                                                                              | 0.75    |
| Pontine tegmentum       | 1.20 (0.84, 1.73)                                                                              | 0.32    | 1.76 (1.07, 2.90)                                                                              | 0.027   | 1.20 (0.77, 1.88)                                                                              | 0.42    |
| Red nucleus             | 1.11 (0.76, 1.62)                                                                              | 0.60    | 1.24 (0.88, 1.76)                                                                              | 0.22    | 1.43 (0.94, 2.18)                                                                              | 0.098   |
| Substantia nigra        | 1.30 (0.90, 1.89)                                                                              | 0.16    | 1.36 (0.94, 1.95)                                                                              | 0.099   | 1.54 (1.06, 2.22)                                                                              | 0.022   |

OR=odds ratio; CI=confidence interval. ORs, 95% CIs, and p-values result from proportional odds logistic regression models that were adjusted for age at death, sex, Braak NFT stage, and Thal amyloid phase, where the outcome measure was the semi-quantitative tau pathology measure (0=none, 1=mild, 2=moderate, 3=severe) for the given anatomical structure. ORs are interpreted as the multiplicative increase in the odds of a more severe tau pathology corresponding to the presence of the *APOE*  $\epsilon 2$  allele (in comparison to the  $\epsilon 3/\epsilon 3$  reference genotype). For categories of tau pathology severity measures that had fewer than 10 patients for a given anatomical structure, these were collapsed with more common categories in proportional odds regression analysis. N/A is given when the given lesion was not assessed in the given anatomical structure.

**Supplemental Table 4: Association of *APOE* genotype with Thal amyloid phase and TDP-43 pathology.**

| <i>APOE</i> genotype<br>(comparisons made<br>vs. the ε3/ε3 reference<br>genotype) | Association with<br>Thal amyloid phase |         | Association with<br>TDP-43 pathology |                   |
|-----------------------------------------------------------------------------------|----------------------------------------|---------|--------------------------------------|-------------------|
|                                                                                   | OR (95% CI)                            | P-value | OR (95% CI)                          | P-value           |
| Presence of ε2                                                                    | 0.80 (0.56, 1.01)                      | 0.24    | 1.48 (0.56, 3.94)                    | 0.43              |
| Presence of ε4                                                                    | 5.62 (4.07, 7.77)                      | <0.0001 | 1.42 (0.58, 3.51)                    | 0.45              |
| Presence of ε2/ε2                                                                 | 0.77 (0.25, 2.41)                      | 0.65    | 2.58 (0.24, 27.56)                   | 0.43              |
| Presence of ε2/ε3                                                                 | 0.74 (0.55, 0.99)                      | 0.003   | 1.02 (0.28, 3.66)                    | 0.98              |
| Presence of ε2/ε4                                                                 | 6.05 (2.56, 14.32)                     | <0.0001 | 2.47 (0.46, 13.33)                   | 0.29              |
| Presence of ε3/ε4                                                                 | 5.36 (3.81, 7.53)                      | <0.0001 | 1.40 (0.54, 3.65)                    | 0.49              |
| Presence of ε4/ε4                                                                 | 16.44 (5.51, 49.03)                    | <0.0001 | NA                                   | 1.00 <sup>1</sup> |

OR=odds ratio; CI=confidence interval. For associations with Thal phase, ORs, 95% CIs, and p-values result from proportional odds logistic regression models that were adjusted for age at death, sex, and Braak stage. ORs are interpreted as the multiplicative increase in the odds of a higher Thal phase corresponding to the presence of the given *APOE* variable (in comparison to the ε3/ε3 reference genotype).. For associations with presence of TDP-43 pathology, ORs, 95% CIs, and p-values result from binary logistic regression models that were adjusted for age at death, sex, Braak stage, and Thal phase. ORs are interpreted as the multiplicative increase in the odds of presence of TDP-43 pathology corresponding to the presence of the given *APOE* variable (in comparison to the ε3/ε3 reference genotype)..<sup>1</sup> P-value results from Fisher's exact test due to the absence of ε4/ε4 patients with TDP-43 pathology.

**Supplemental Table 5: Subject characteristics for human genetic study**

| Series               | PSP patients<br>(N=994) | CBD patients<br>(N=134) | Controls<br>(N=1406) |
|----------------------|-------------------------|-------------------------|----------------------|
| Age                  | 75 (52, 98)             | 69 (46, 96)             | 75 (45, 100)         |
| Gender               |                         |                         |                      |
| Male                 | 534 (53.7%)             | 68 (50.8%)              | 624 (44.4%)          |
| Female               | 460 (46.3%)             | 66 (49.3%)              | 782 (55.6%)          |
| <i>MAPT</i> genotype |                         |                         |                      |
| H1/H1                | 884 (89.0%)             | 114 (87.0%)             | 805 (57.3%)          |
| H1/H2                | 106 (10.7%)             | 16 (12.2%)              | 514 (36.6%)          |
| H2/H2                | 3 (0.3%)                | 1 (0.8%)                | 85 (6.1%)            |

The sample median (minimum, maximum) is given for age, which is the age at death in PSP and CBD patients and the age at blood draw in controls. *MAPT* genotype was unavailable for 1 PSP patient, 3 CBD patients, and 2 controls.
